# Supplementary material for: Three isostructural hexanuclear lanthanide–organic frameworks for sensitive luminescence temperature sensing over a wide range
Source: Royal Society of Chemistry journal article supplement (doi:10.1039/d1dt04190h), 2022-01-01
Supplement: d1dt04190h1.pdf [file d1dt04190h1.pdf]

## Supporting Information

### Three Isostructural Hexanuclear Lanthanide-Organic Frameworks for Sensitive Luminescence Temperature Sensing Over a Wide Range

Tifeng Xia,<sup>\*ab</sup> Wenqian Cao,<sup>b</sup> Lingling Guan,<sup>b</sup> Jun Zhang,<sup>\*a</sup> Fudong Jiang,<sup>a</sup> Libing Yu,<sup>a</sup> and Yating Wan,<sup>\*c</sup>

<sup>a</sup> Institute of Materials, China Academy of Engineering Physics, Mianyang 621907, China. E-mail: [xiatifeng@caep.cn](mailto:xiatifeng@caep.cn) (T. Xia), [j-zhang@caep.cn](mailto:j-zhang@caep.cn) (J. Zhang)

<sup>b</sup> State Key Laboratory of Silicon Materials, Cyrus Tang Center for Sensor Materials and Applications, School of Materials Science and Engineering, Zhejiang University, Hangzhou 310027, China.

<sup>c</sup> Shanghai Institute of Laser Plasma, China Academy of Engineering Physics, Shanghai 201800, China. E-mail: [ytwan@zju.edu.cn](mailto:ytwan@zju.edu.cn)

**Table S1** The molar ratio of the starting Eu/Tb salt and that in isomorphous Eu<sup>3+</sup>/Tb<sup>3+</sup> co-doped MOFs calculated by ICP analyses.

| Samples                                     | Tested Eu by ICP analysis (ppm) | Tested Tb by ICP analysis (ppm) | The Eu/Tb ratios calculated by ICP analysis |
|---------------------------------------------|---------------------------------|---------------------------------|---------------------------------------------|
| Eu <sub>0.001</sub> Tb <sub>0.999</sub> -0N | 0.3233                          | 124.1                           | 0.0026:0.9974                               |
| Eu <sub>0.001</sub> Tb <sub>0.999</sub> -1N | 0.0673                          | 38.94                           | 0.0017:0.9983                               |
| Eu <sub>0.001</sub> Tb <sub>0.999</sub> -2N | 0.1002                          | 32.80                           | 0.0030:0.9970                               |

**Table S2** Fitting parameters of isomorphous Eu<sup>3+</sup>/Tb<sup>3+</sup> mixed MOFs with double exponential Mott-Seitz model.

| Ln-MOFs                                                  | $A_0$   | $\alpha_1$ | $\Delta E_1$ | $\alpha_2$ | $\Delta E_2$ | $R^2$  |
|----------------------------------------------------------|---------|------------|--------------|------------|--------------|--------|
| Eu <sub>0.001</sub> Tb <sub>0.999</sub> -0N <sup>a</sup> | 1.14611 | 4.93616    | 121.858      | 196.053    | 630.975      | 0.9986 |
| Eu <sub>0.001</sub> Tb <sub>0.999</sub> -0N <sup>b</sup> | 14.9587 | 4.9435     | 121.988      | 196.558    | 631.520      | 0.9986 |
| Eu <sub>0.001</sub> Tb <sub>0.999</sub> -1N <sup>a</sup> | 1.18613 | 45.3146    | 101.299      | 3032.19    | 573.568      | 0.9999 |
| Eu <sub>0.001</sub> Tb <sub>0.999</sub> -1N <sup>b</sup> | 299.108 | 45.1351    | 101.457      | 3021.64    | 573.990      | 0.9999 |
| Eu <sub>0.001</sub> Tb <sub>0.999</sub> -2N <sup>a</sup> | 3.37050 | 9.48916    | 48.1217      | 2677.79    | 679.935      | 0.9996 |
| Eu <sub>0.001</sub> Tb <sub>0.999</sub> -2N <sup>b</sup> | 136.870 | 9.1291     | 48.7506      | 2589.08    | 680.871      | 0.9996 |

<sup>a</sup> Normalized to 50 K; <sup>b</sup> Normalized to 300 K.

**Table S3** A summary of some reported ratiometric MOF-based thermometers.

| Luminescent MOF                                                                                         | Range (K)     | $S_m$ (%·K <sup>-1</sup> ) | $T_m$ (K)  |
|---------------------------------------------------------------------------------------------------------|---------------|----------------------------|------------|
| <b>Eu<sub>0.001</sub>Tb<sub>0.999</sub>(BPDC-0N)</b>                                                    | <b>50-300</b> | <b>1.10</b>                | <b>188</b> |
| <b>Eu<sub>0.001</sub>Tb<sub>0.999</sub>(BPDC-1N)</b>                                                    | <b>50-300</b> | <b>4.11</b>                | <b>50</b>  |
| <b>Eu<sub>0.001</sub>Tb<sub>0.999</sub>(BPDC-2N)</b>                                                    | <b>50-300</b> | <b>1.94</b>                | <b>50</b>  |
| 9.1wt%EuW <sub>10</sub> @Tb-TATB <sup>1</sup>                                                           | 200-320       | 2.68                       | 300        |
| 19.5wt%EuW <sub>10</sub> @Tb-TATB <sup>1</sup>                                                          | 200-320       | 2.37                       | 300        |
| Tb <sub>0.99</sub> Eu <sub>0.01</sub> (bdc) <sub>1.5</sub> (in water) <sup>2</sup>                      | 290-320       | 0.31                       | 318        |
| Tb <sub>0.99</sub> Eu <sub>0.01</sub> (bdc) <sub>1.5</sub> (solid) <sup>2</sup>                         | 290-320       | 0.14                       | 318        |
| Dycpia <sup>3</sup>                                                                                     | 298-473       | 0.42                       | 473        |
| ZJU-88⊃perylene <sup>4</sup>                                                                            | 293-353       | 1.28                       | 293        |
| [Tb <sub>0.970</sub> Eu <sub>0.030</sub> (CH <sub>3</sub> COO)(1,3-bdc)(H <sub>2</sub> O)] <sup>5</sup> | 150-350       | 0.19                       | 338        |
| [Tb <sub>0.950</sub> Eu <sub>0.050</sub> (CH <sub>3</sub> COO)(1,3-bdc)(H <sub>2</sub> O)] <sup>5</sup> | 150-350       | 0.20                       | 333        |
| [Tb <sub>0.925</sub> Eu <sub>0.075</sub> (CH <sub>3</sub> COO)(1,3-bdc)(H <sub>2</sub> O)] <sup>5</sup> | 150-350       | 0.24                       | 314        |
| [Tb <sub>0.900</sub> Eu <sub>0.100</sub> (CH <sub>3</sub> COO)(1,3-bdc)(H <sub>2</sub> O)] <sup>5</sup> | 150-350       | 0.31                       | 284        |
| [Tb <sub>0.875</sub> Eu <sub>0.125</sub> (CH <sub>3</sub> COO)(1,3-bdc)(H <sub>2</sub> O)] <sup>5</sup> | 150-350       | 0.40                       | 251        |
| [Tb <sub>0.850</sub> Eu <sub>0.150</sub> (CH <sub>3</sub> COO)(1,3-bdc)(H <sub>2</sub> O)] <sup>5</sup> | 150-350       | 0.44                       | 236        |
| Cdots&RB@ZIF-82-MMM-1 <sup>6</sup>                                                                      | 293-353       | 0.74                       | 293        |
| Eu <sub>0.0025</sub> Tb <sub>0.9975</sub> -BABDC-PBMA <sup>7</sup>                                      | 90-240        | 3.61                       | 240        |

**Table S4** Crystallographic Data Collection and Refinement Results for **Eu(BPDC-2N)**.

| <b>Sample</b>                                                                            | <b>Eu(BPDC-2N)</b>                                                                                |
|------------------------------------------------------------------------------------------|---------------------------------------------------------------------------------------------------|
| Chemical formula                                                                         | C <sub>72</sub> H <sub>45</sub> Eu <sub>6</sub> F <sub>8</sub> N <sub>12</sub> O <sub>27.50</sub> |
| Formula weight                                                                           | 2581.96                                                                                           |
| Temperature (K)                                                                          | 173                                                                                               |
| Wavelength (Å)                                                                           | 0.71073                                                                                           |
| Crystal system                                                                           | Cubic                                                                                             |
| Space group                                                                              | Fm-3m                                                                                             |
| <i>a</i> (Å)                                                                             | 27.498(6)                                                                                         |
| <i>b</i> (Å)                                                                             | 27.498(6)                                                                                         |
| <i>c</i> (Å)                                                                             | 27.498(6)                                                                                         |
| <i>V</i> (Å <sup>3</sup> )                                                               | 20792(15)                                                                                         |
| Z                                                                                        | 4                                                                                                 |
| Density (calculated g·cm <sup>-3</sup> )                                                 | 0.825                                                                                             |
| Absorbance coefficient (mm <sup>-1</sup> )                                               | 1.824                                                                                             |
| <i>F</i> (000)                                                                           | 4924                                                                                              |
| Crystal size (mm <sup>3</sup> )                                                          | 0.12 × 0.11 × 0.10                                                                                |
| <i>R</i> (int)                                                                           | 0.0464                                                                                            |
| Goodness of fit on <i>F</i> <sub>2</sub>                                                 | 1.029                                                                                             |
| <i>R</i> <sub>1</sub> , <i>wR</i> <sub>2</sub> [ <i>I</i> > 2σ( <i>I</i> )] <sup>a</sup> | 0.0259, 0.0734                                                                                    |
| <i>R</i> <sub>1</sub> , <i>wR</i> <sub>2</sub> (all data) <sup>a</sup>                   | 0.0276, 0.0744                                                                                    |
| Largest difference peak and hole (e Å <sup>-3</sup> )                                    | 0.555, -0.660                                                                                     |

<sup>a</sup>

$$R1 = \sum (|F_o| - |F_c|) / \sum |F_o|; wR2 = \left[ \frac{\sum w(|F_o| - |F_c|)^2}{\sum wF_o^2} \right]^{1/2}$$

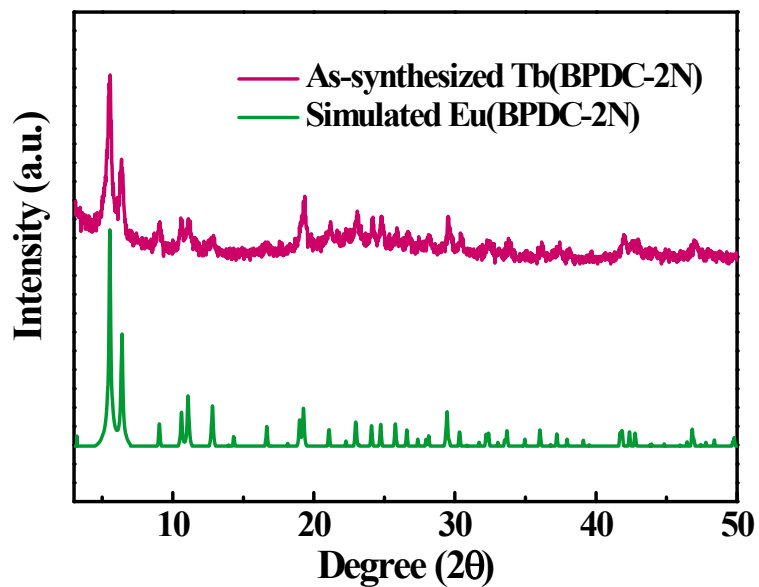

Figure S1. The PXRD patterns of simulated Eu(BPDC-2N) and as-synthesized Tb(BPDC-2N).

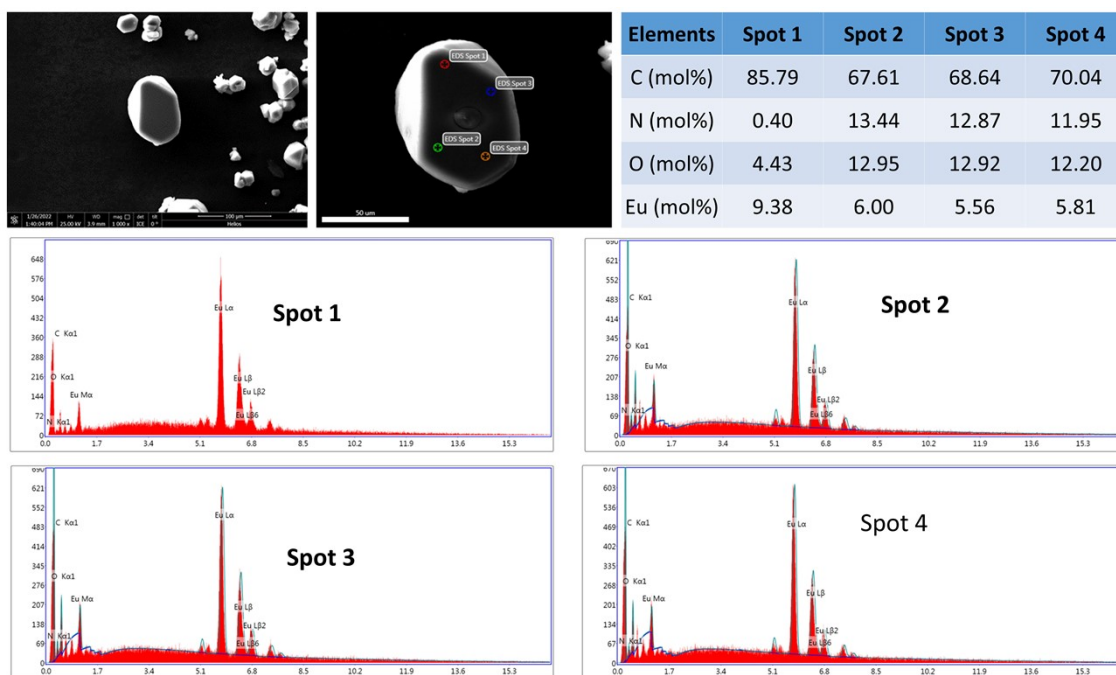

Figure S2. SEM and SEM-EDX of Eu(BPDC-2N).

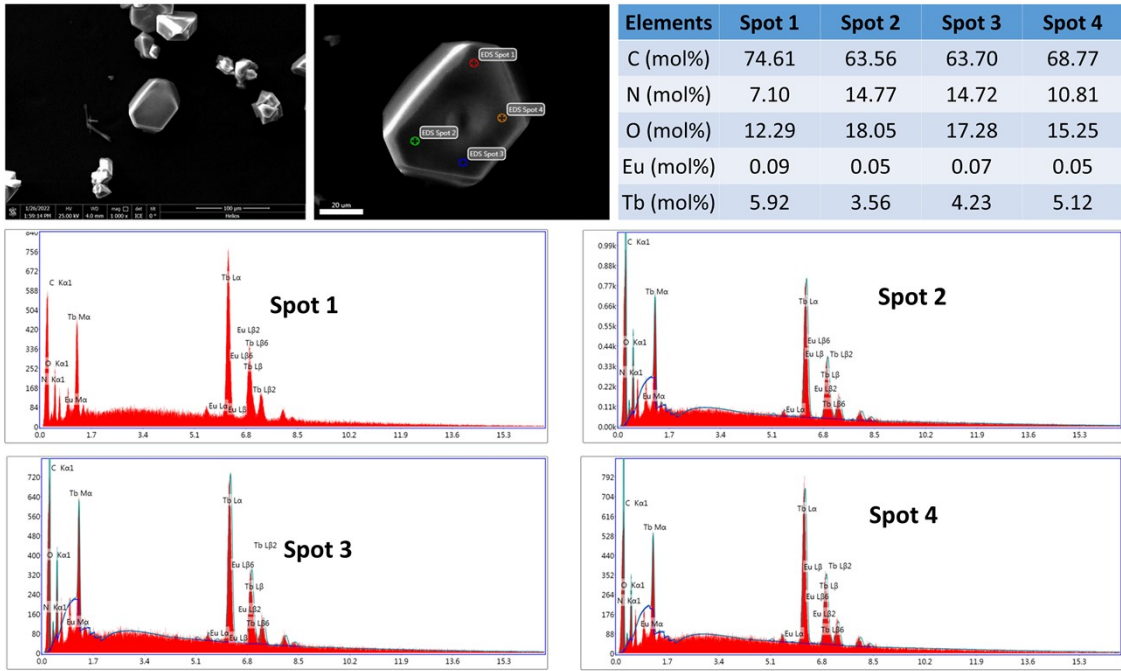

Figure S3. SEM and SEM-EDX of  $\text{Eu}_{0.001}\text{Tb}_{0.999}(\text{BPDC-2N})$ .

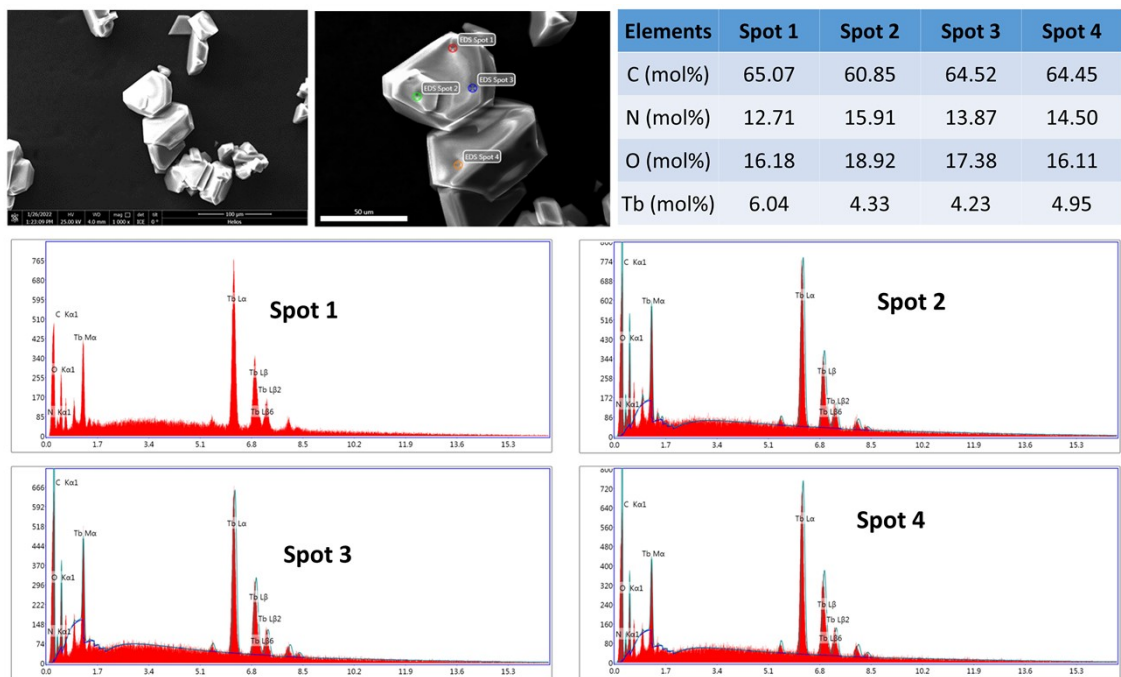

Figure S4. SEM and SEM-EDX of  $\text{Tb}(\text{BPDC-2N})$ .

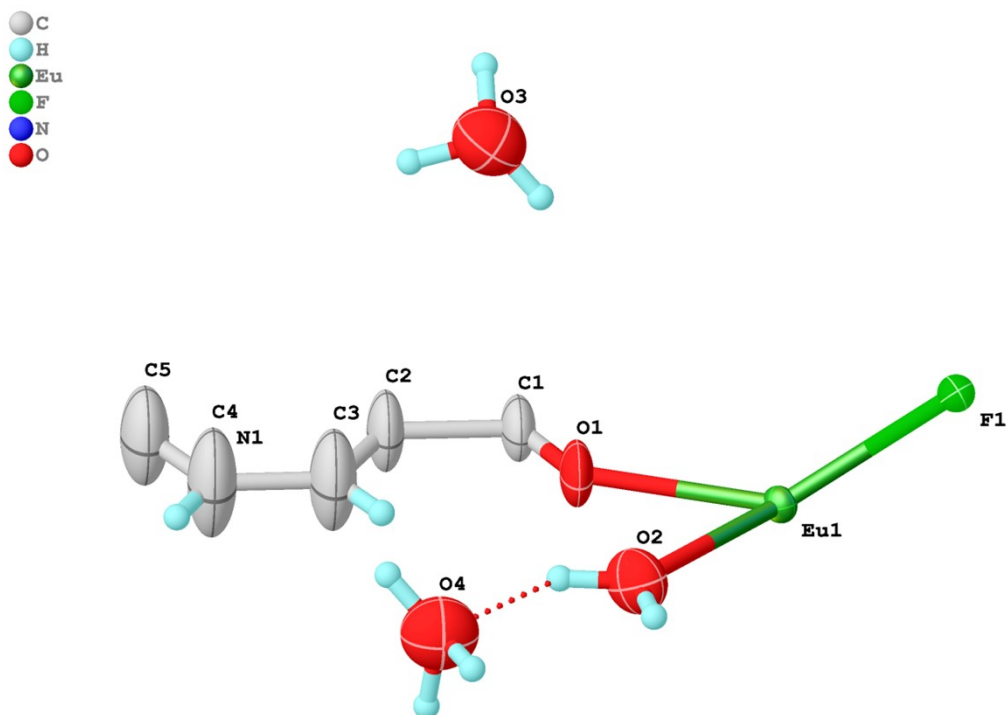

**Figure S5.** Ortep representation of the asymmetric unit in Eu(BPDC-2N) (50% probability factor for the thermal ellipsoids).

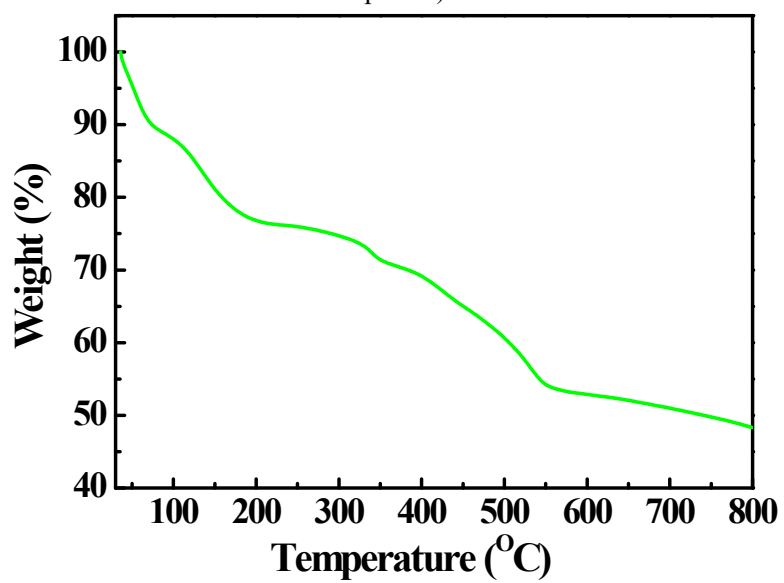

**Figure S6.** TGA curves of Eu(BPDC-2N).

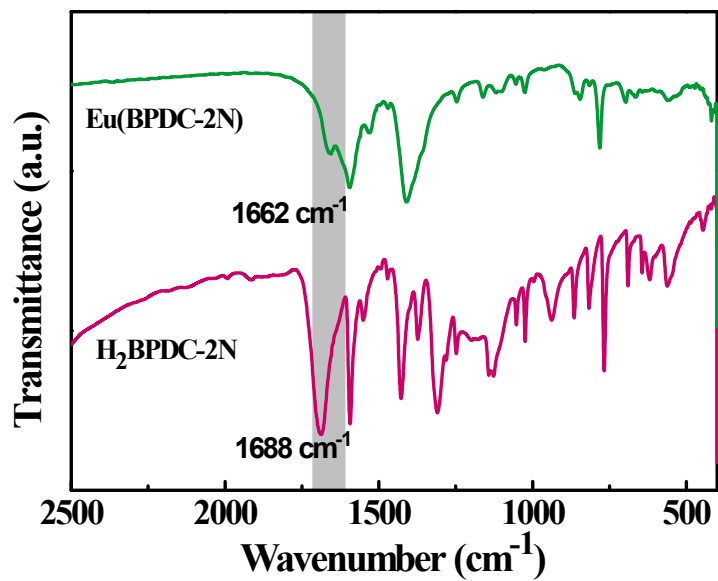

Figure S7. FT-IR spectra of organic ligand H<sub>2</sub>BPDC-2N and Eu(BPDC-2N).

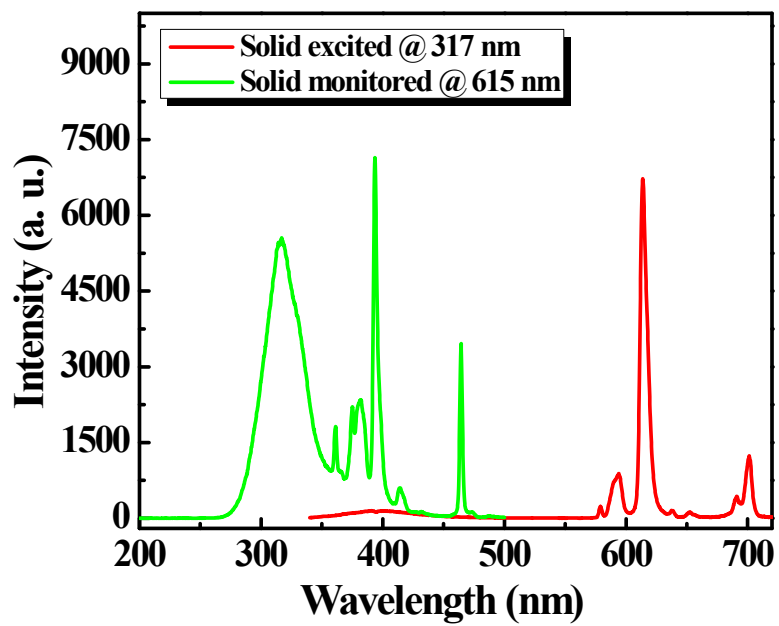

Figure S8. Excitation and emission spectra of Eu(BPDC-0N) at room temperature.

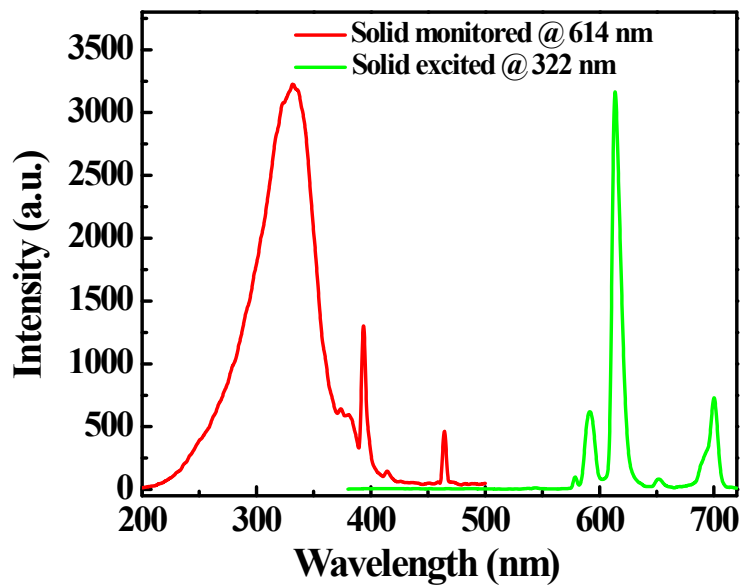

Figure S9. Excitation and emission spectra of Eu(BPDC-1N) at room temperature.

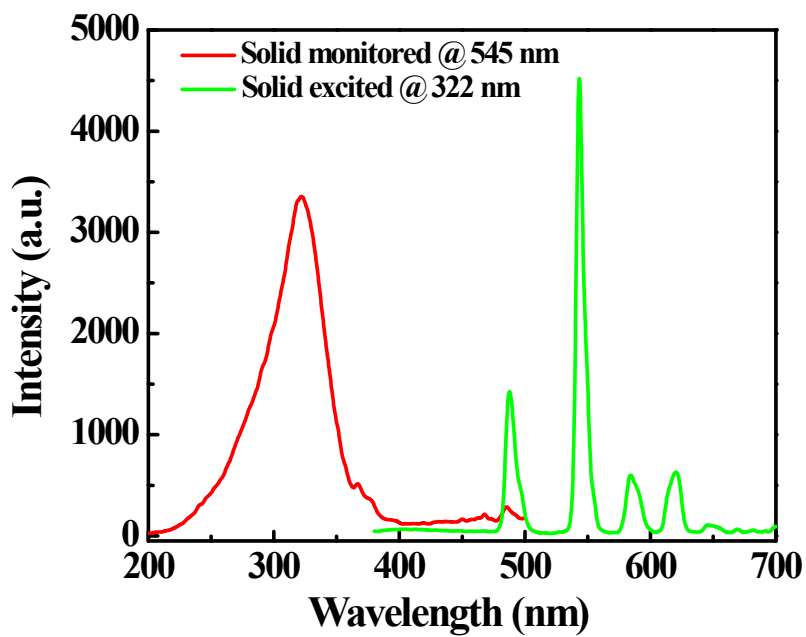

Figure S10. Excitation and emission spectra of Tb(BPDC-1N) at room temperature.



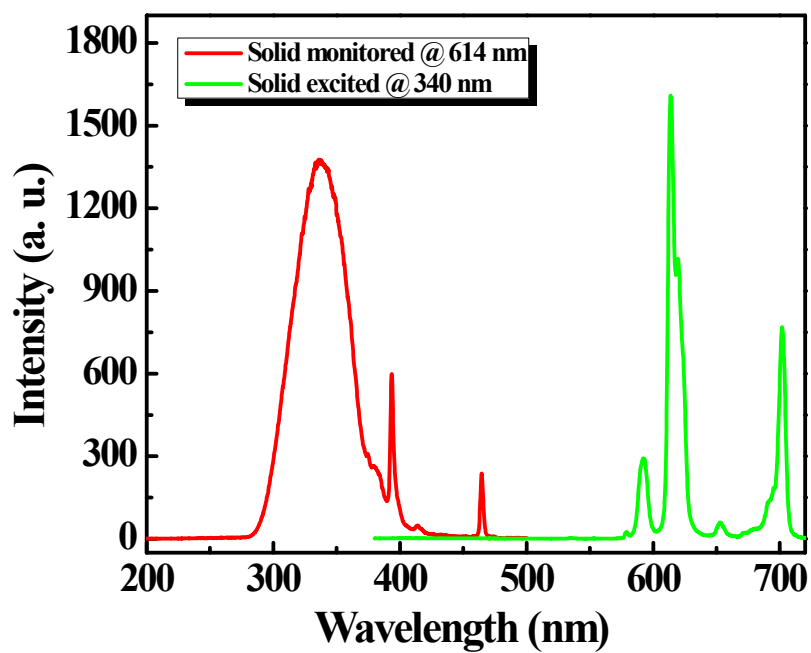

Figure S11. Excitation and emission spectra of Eu(BPDC-2N) at room temperature.

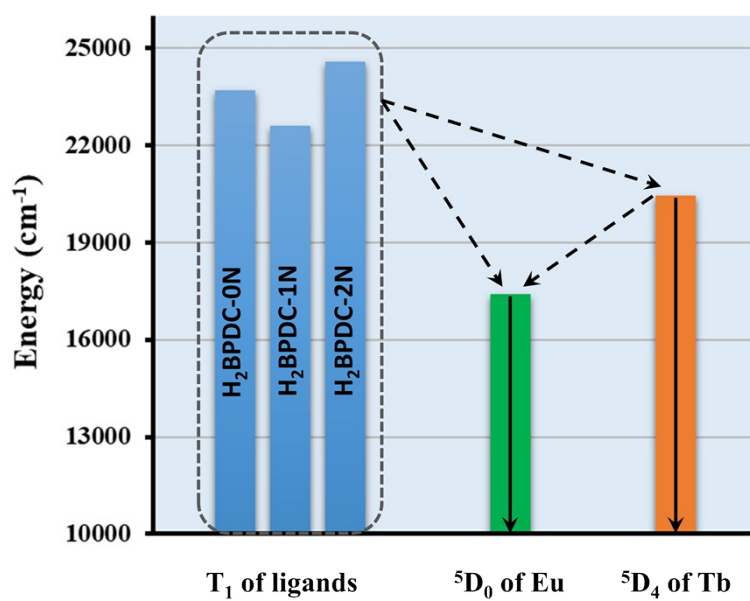

Figure S12. The calculated triplet levels of  $H_2BPDC-xN$  ( $x = 0, 1, 2$ ) and energy levels of Eu ( $^5D_0$ ) and Tb ( $^5D_4$ ).

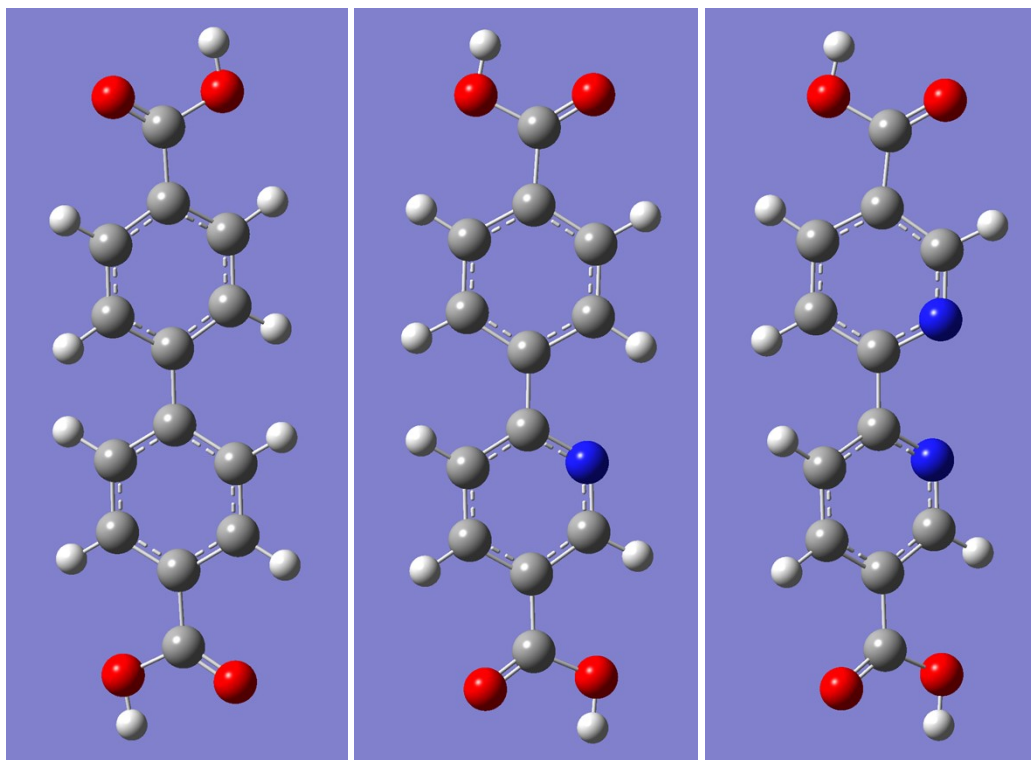

**Figure S13.** The optimized geometry of free ligands H<sub>2</sub>BPDC-*x*N (*x* = 0, 1, 2) at the B3LYP/6-31G\* level.

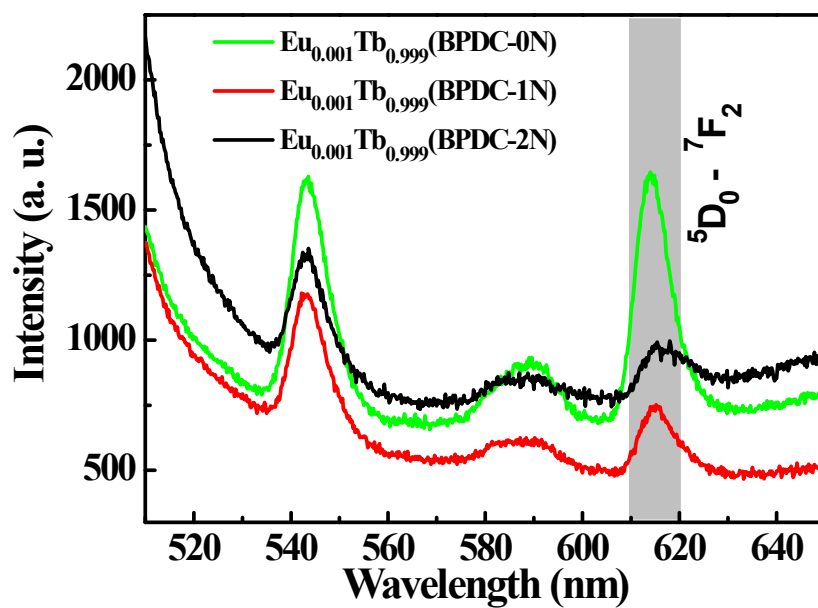

**Figure S14.** Emission spectra of Eu<sub>0.001</sub>Tb<sub>0.999</sub>(BPDC-*x*N) (*x* = 0, 1, 2) excited at 488 nm.

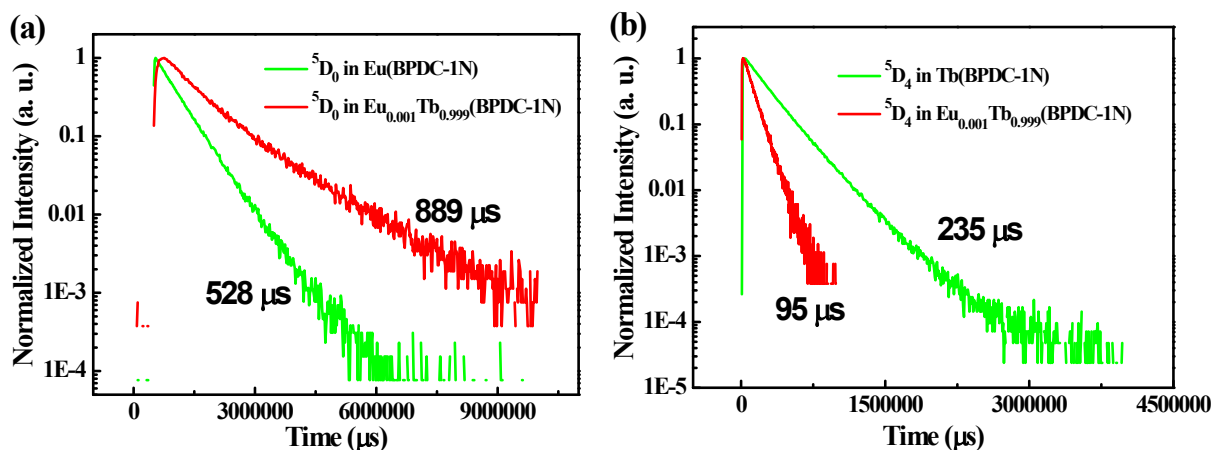

**Figure S15.** Fluorescence decay curves of  $^5D_0$  (a) and  $^5D_4$  (b) in Eu(BPDC-1N), Tb(BPDC-1N), and  $\text{Eu}_{0.001}\text{Tb}_{0.999}$ (BPDC-1N).

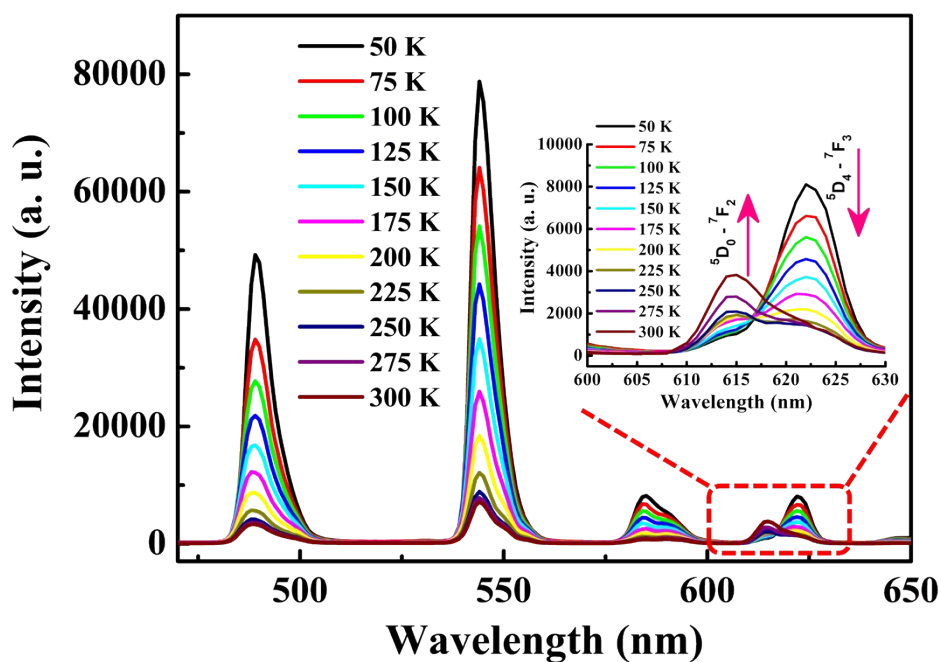

**Figure S16.** Temperature-dependent emission spectra of  $\text{Eu}_{0.001}\text{Tb}_{0.999}$ (BPDC-2N) in the temperature range from 50 K to 300 K.

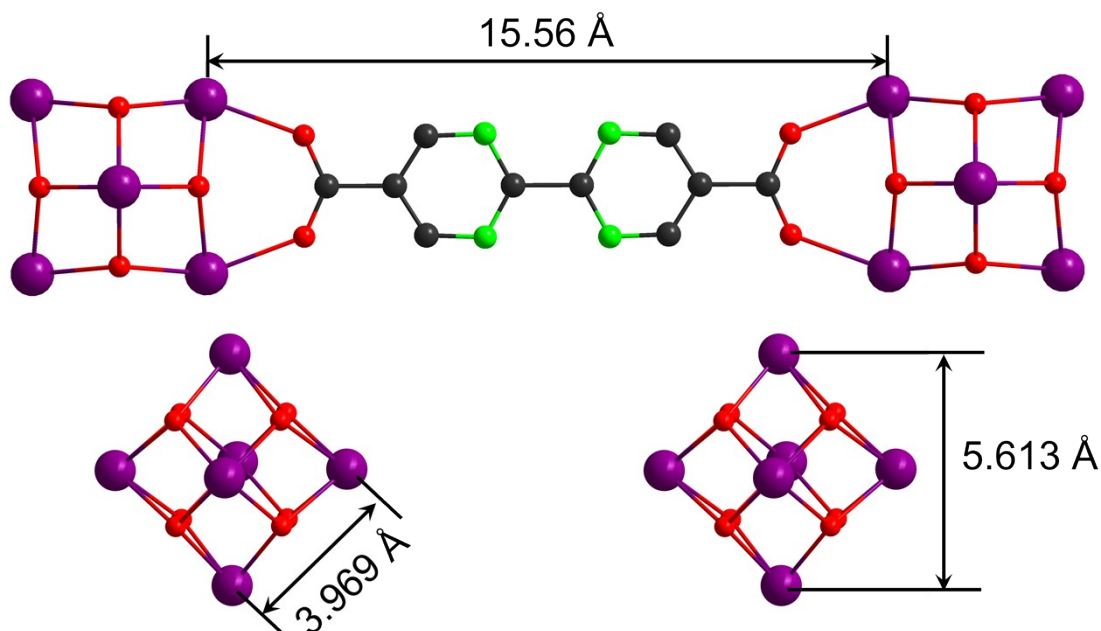

**Figure S17.** The shortest distance of two lanthanide ions in the adjacent SBUs and two possible distances between  $\text{Tb}^{3+}$  and  $\text{Eu}^{3+}$  in the same SBU.

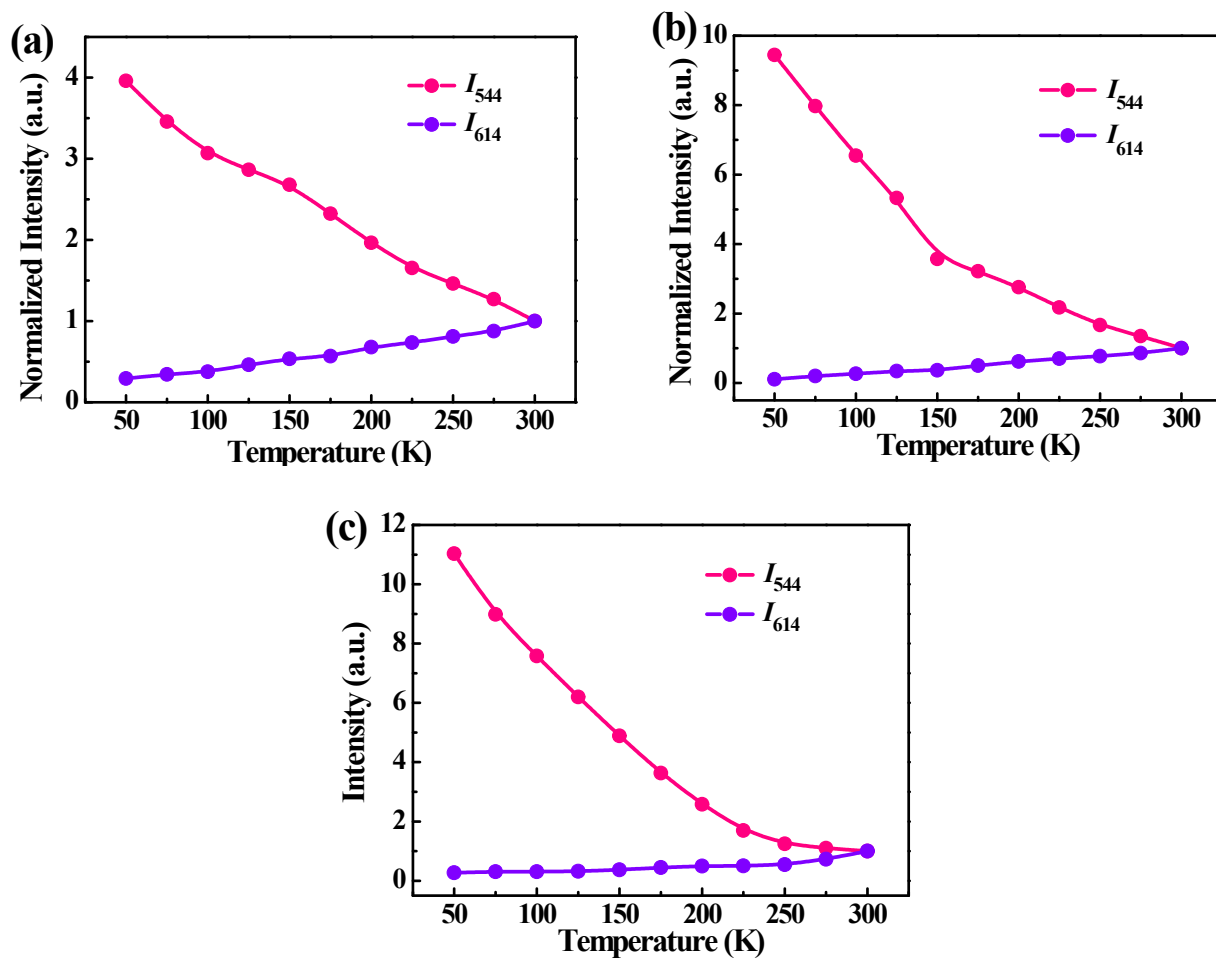

**Figure S18.** Normalized luminescence intensity of  ${}^5\text{D}_4 - {}^7\text{F}_5$  transition and  ${}^5\text{D}_0 - {}^7\text{F}_2$  transition for (a)  $\text{Eu}_{0.001}\text{Tb}_{0.999}(\text{BPDC-0N})$ , (b)  $\text{Eu}_{0.001}\text{Tb}_{0.999}(\text{BPDC-1N})$  and (c)  $\text{Eu}_{0.001}\text{Tb}_{0.999}(\text{BPDC-2N})$ , respectively.

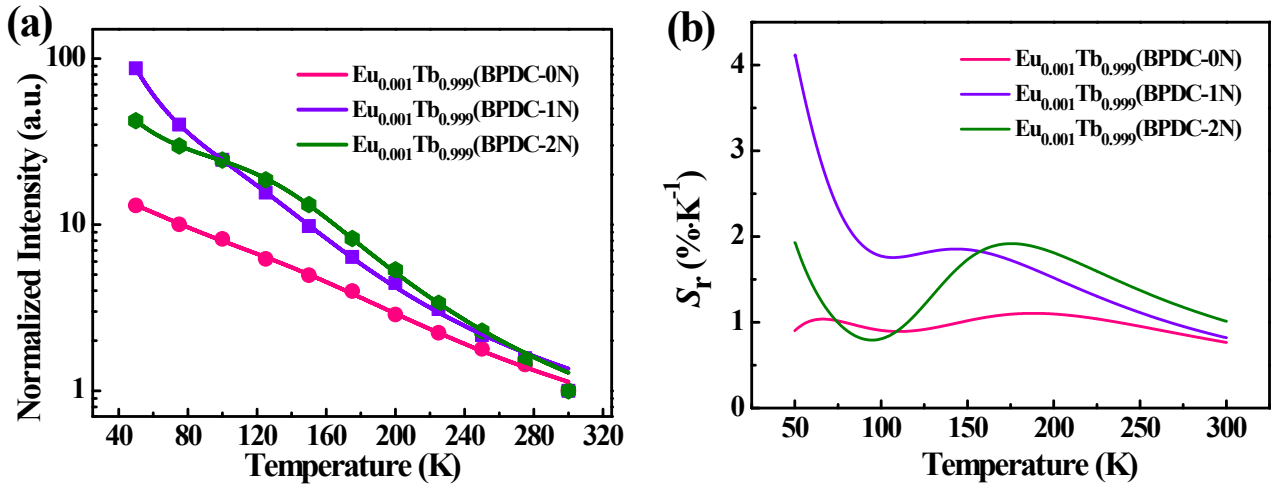

Figure S19. The fitting curves (a) and temperature-dependent relative sensitivity (b) of  $\text{Eu}_{0.001}\text{Tb}_{0.999}(\text{BPDC-}x\text{N})$  ( $x = 0, 1, 2$ ) when luminescence intensities were normalized to the intensity at 300 K.

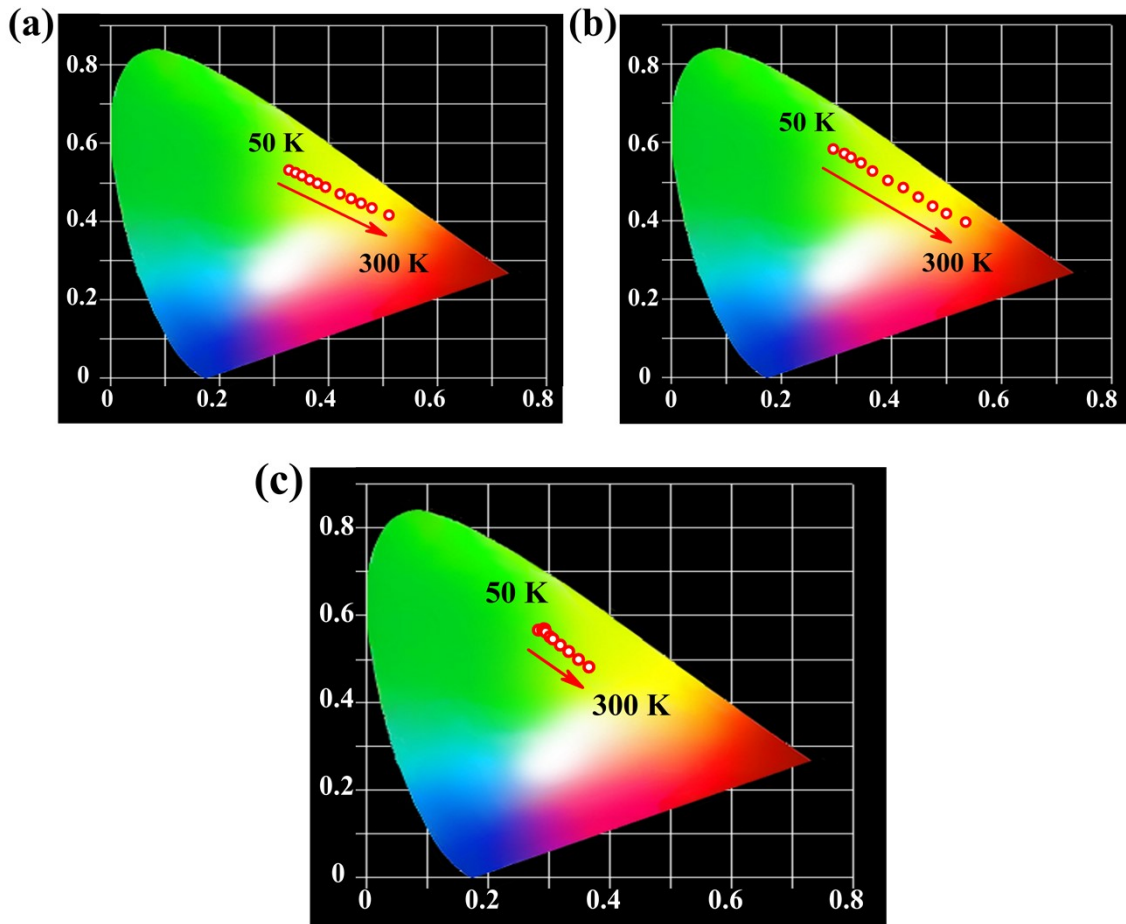

Figure S20. CIE chromaticity diagram presenting the temperature-dependent color of (a)  $\text{Eu}_{0.001}\text{Tb}_{0.999}(\text{BPDC-}0\text{N})$ , (b)  $\text{Eu}_{0.001}\text{Tb}_{0.999}(\text{BPDC-}1\text{N})$  and (c)  $\text{Eu}_{0.001}\text{Tb}_{0.999}(\text{BPDC-}2\text{N})$  in the temperature range from 50 K to 300 K.

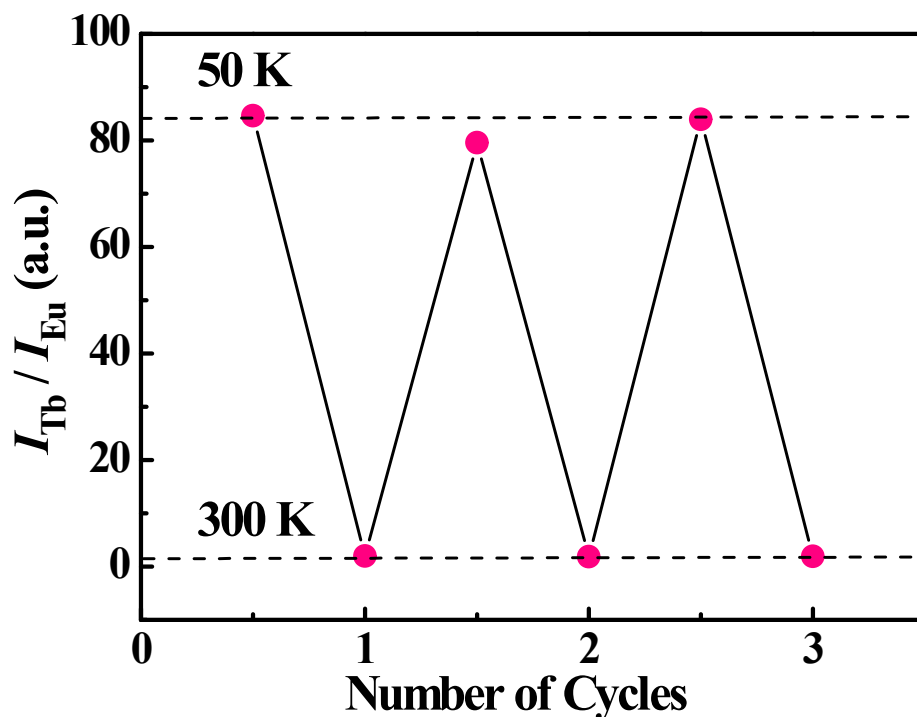

**Figure S21.** The reversible emission intensity ratio of Tb (544 nm) to Eu (614 nm) of  $\text{Eu}_{0.001}\text{Tb}_{0.999}(\text{BPDC-2N})$  in cycles of heating and cooling.

## References

- 1 C. Viravaux, O. Oms, A. Dolbecq, E. Nassar, L. Busson, C. Mellot-Draznieks, R. Dessapt, H. Serier-Brault and P. Mialane, *Journal of Materials Chemistry C*, 2021, **9**, 8323.
- 2 A. Cadiau, C. D. S. Brites, P. M. F. J. Costa, R. A. S. Ferreira, J. Rocha and L. D. Carlos, *ACS Nano*, 2013, **7**, 7213.
- 3 T. Xia, Y. Cui, Y. Yang and G. Qian, *Journal of Materials Chemistry C*, 2017, **5**, 5044.
- 4 Y. Cui, R. Song, J. Yu, M. Liu, Z. Wang, C. Wu, Y. Yang, Z. Wang, B. Chen and G. Qian, *Advanced Materials*, 2015, **27**, 1420.
- 5 V. Trannoy, A. N. Carneiro Neto, C. D. S. Brites, L. D. Carlos and H. Serier-Brault, *Advanced Optical Materials*, 2021, **9**, 2001938.
- 6 Y. Ding, Y. Lu, K. Yu, S. Wang, D. Zhao and B. Chen, *Advanced Optical Materials*, 2021, **9**, 2100945.
- 7 T. Feng, Y. Ye, X. Liu, H. Cui, Z. Li, Y. Zhang, B. Liang, H. Li and B. Chen, *Angewandte Chemie International Edition*, 2020, **59**, 21752.
